# Supplementary material for: High Diversity of Long Terminal Repeat Retrotransposons in Compact Vertebrate Genomes: Insights from Genomes of Tetraodontiformes
Source: MDPI journal article supplement (doi:10.3390/ani14101425), 2024-05-10
Supplement: s1 [file s1]

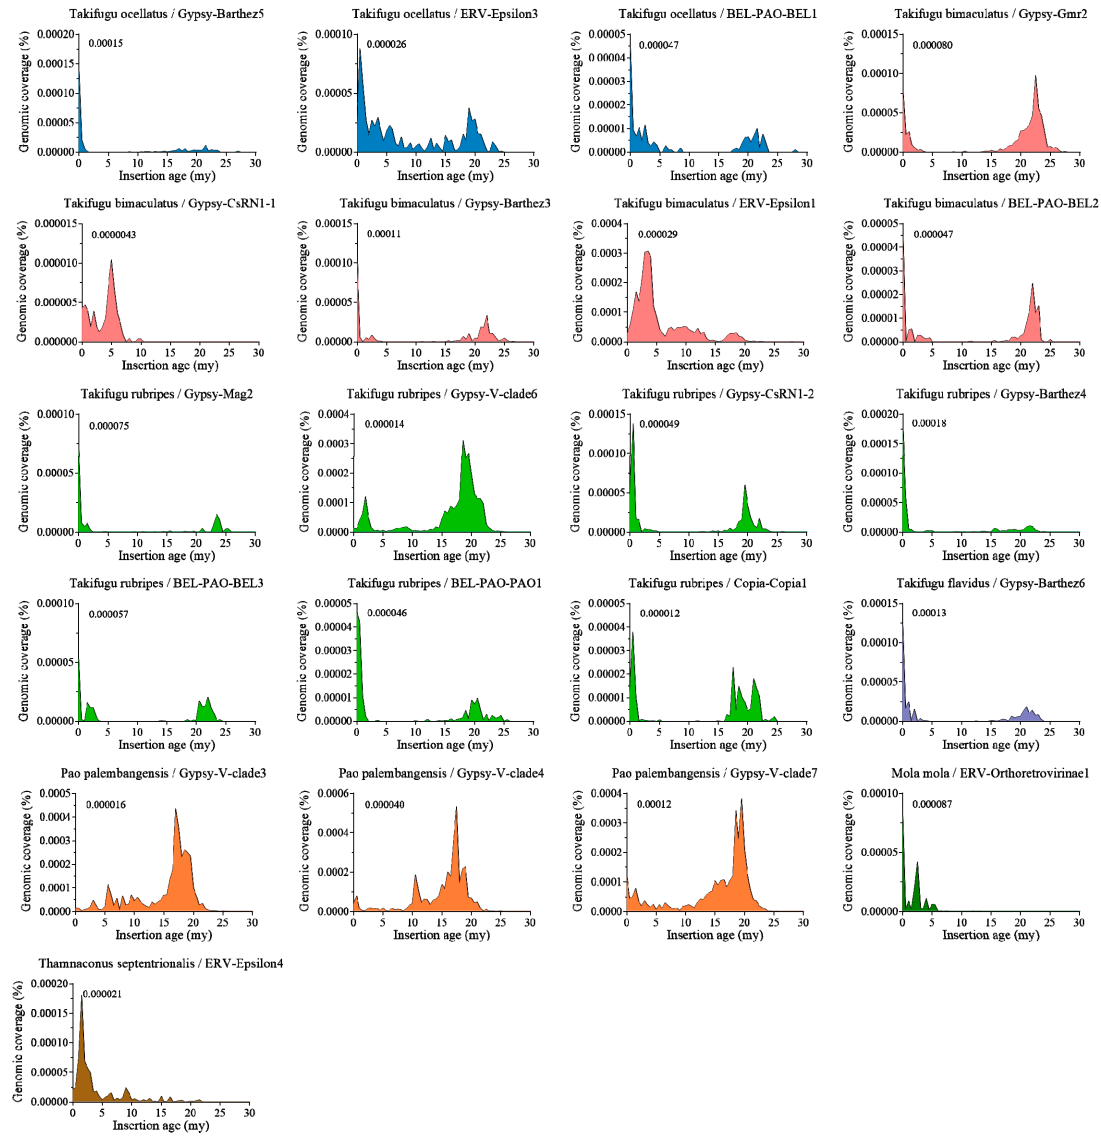

**Figure S1.** Evolutionary dynamics of LTR-RTNs in *Tetraodontiformes*: Insights from insertion ages of LTR-RTNs. The x-axis represents the insertion age (My, millions of years), and the y-axis represents the coverage (%) of each LTR-RTN in the genome. The number on the right side of the Y-axis indicates the genomic percentage with LTR-RTNs inserted at age 0.
